# Supplementary material
Source: Springer Nature journal article supplement (https://www.springermedizin.de/resource/supplementary/12889_2013_6643_MOESM1_ESM.pdf/9498692)

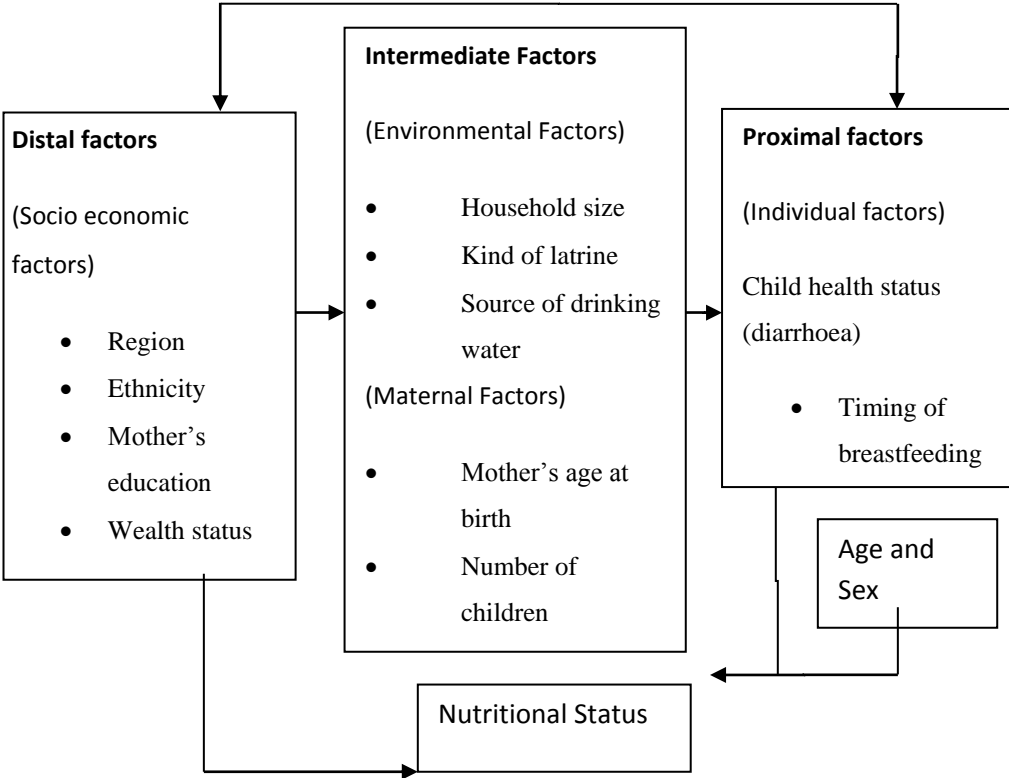

Source: Adapted from Hein and Hoa (2009)

Supplement: MOESM1 [file 9498692]
